# Supplementary material
Source: Elsevier journal article supplement (https://www.sciencedirect.com/science/article/pii/S1885585722001876)

**Tabla 1 del material adicional**

Modelo multivariado dicotómico de los biomarcadores con significación estadística, utilizando el mejor punto de corte para cada variable

|                          | OR (IC95%)    | p     |
|--------------------------|---------------|-------|
| $\ln\text{CA125} \geq 3$ | 5,3 (1,06-26) | 0,04  |
| $\text{FIB4} \geq 0,75$  | 24 (2,6–218)  | 0,005 |
| $\text{ADE} \geq 14,5$   | 33 (2,4–450)  | 0,009 |

ADE: amplitud de distribución eritrocitaria; CA125: antígeno carbohidratado 125; FIB4: fibrosis 4; IC95%: intervalo de confianza del 95%; OR: *odds ratio*.

**Figura 1 del material adicional.** Curvas ROC para detectar el evento combinado de las 3 variables que mantuvieron significación estadística en el modelo multivariado. ADE: amplitud de distribución eritrocitaria; CA125: antígeno carbohidratado 125; FIB4: fibrosis 4.

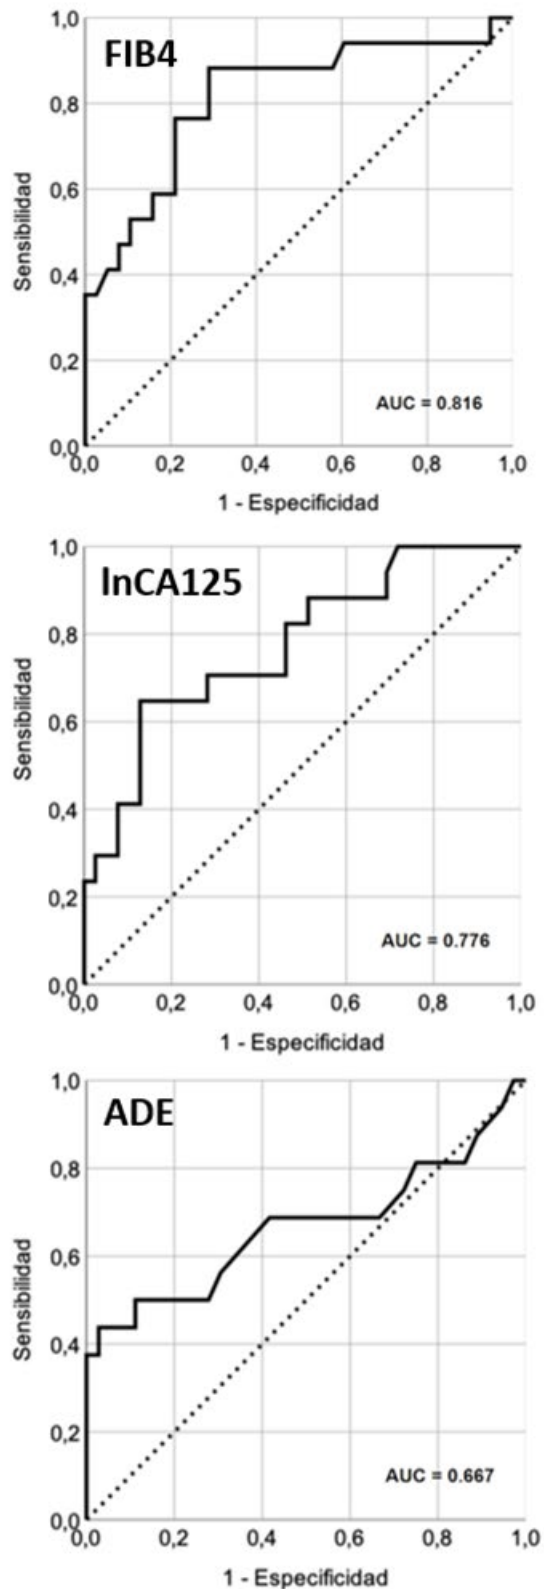

Supplement: mmc1 [file mmc1.pdf]
